# Supplementary material for: Ear-Bot: Locust Ear-on-a-Chip Bio-Hybrid Platform
Source: MDPI journal article supplement (doi:10.3390/s21010228), 2021-01-01
Supplement: s1 [file s1]

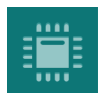

Supporting information for:

**Ear-Bot: Locust Ear-on-a-Chip Bio-hybrid Platform**

**Idan Fishel<sup>1,2</sup>, Yoni Amit<sup>1\*</sup>, Neta Shvil<sup>1,3\*</sup>, Anton Sheinin<sup>1</sup>, Amir Ayali<sup>1,3,#</sup>, Yossi Yovel<sup>1,3,#</sup> and Ben M. Maoz<sup>2,3,4#</sup>**

- <sup>1</sup> School of Zoology, Tel Aviv University, 6997801 Tel Aviv, Israel; [idanfishel@mail.tau.ac.il](mailto:idanfishel@mail.tau.ac.il) (I.F.);  
[yoniamit@tauex.tau.ac.il](mailto:yoniamit@tauex.tau.ac.il) (Y.M.); [shviln@mail.tau.ac.il](mailto:shviln@mail.tau.ac.il) (N.S.); [ayali@tauex.tau.ac.il](mailto:ayali@tauex.tau.ac.il) (A.A.); [yossiy@tauex.tau.ac.il](mailto:yossiy@tauex.tau.ac.il) (Y.Y.)  
<sup>2</sup> Department of Biomedical Engineering, Tel Aviv University, PO Box 39040 Tel Aviv, Israel;  
<sup>3</sup> Sagol School of Neuroscience, Tel Aviv University, 6997801 Tel Aviv, Israel (A.S.) [santon@post.tau.ac.il](mailto:santon@post.tau.ac.il)  
<sup>4</sup> School of Mechanical Engineering, Tel Aviv University, 6997801 Tel Aviv, Israel  
<sup>5</sup> The Center for Nanoscience and Nanotechnology, Tel Aviv University, 6997801 Tel Aviv, Israel

† Authors have equally contributed.

\* Correspondence: [bmaoz@tauex.tau.ac.il](mailto:bmaoz@tauex.tau.ac.il)

Received: date; Accepted: date; Published: date

**Figure S1**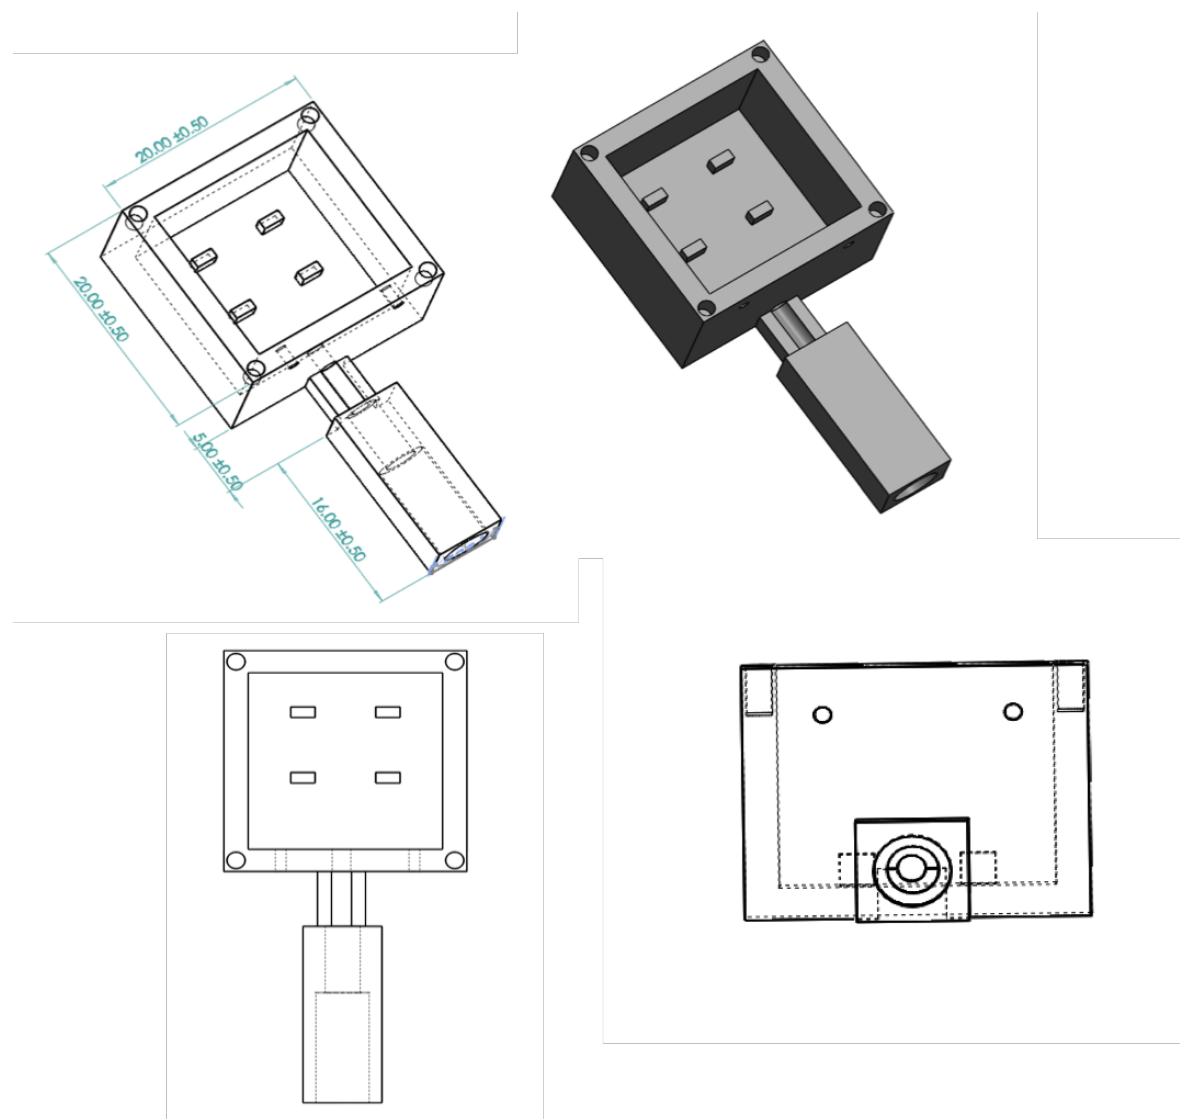**Figure S1: The Ear-Chip**

CAD schematics of the Ear-Chip.

Figure S2

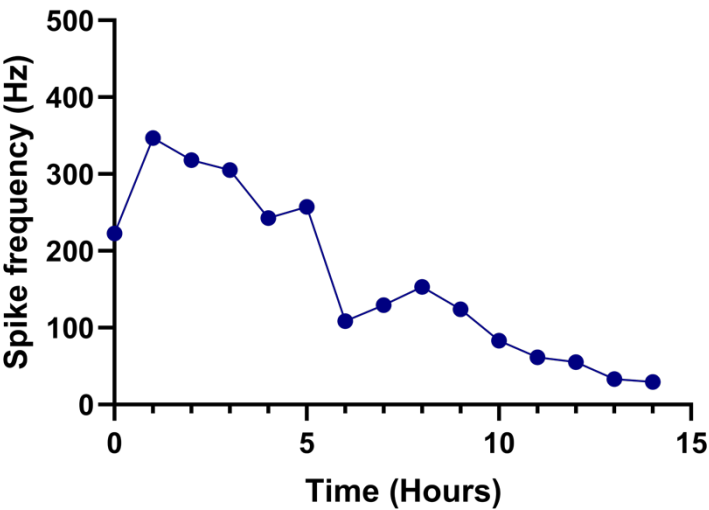

Figure S2: Stability analysis

Stability analysis of a single ear responding to 1kHz sounds for several hours.

**Figure S3**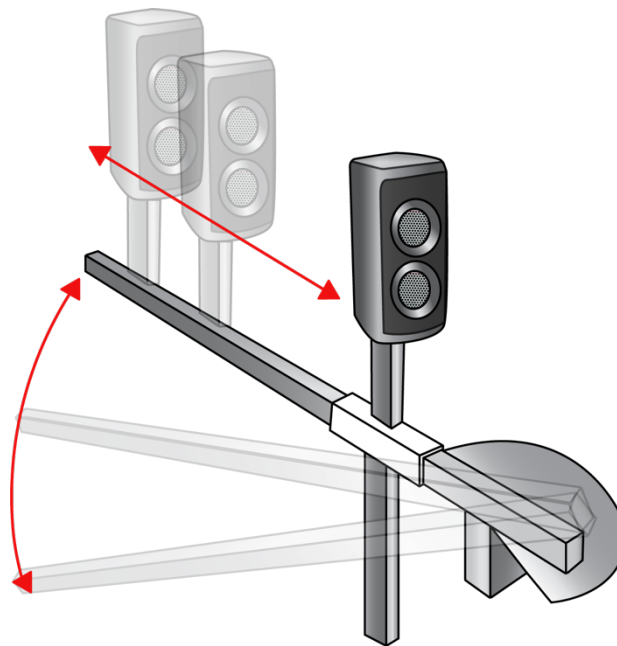**Figure S3: Custom platform for assessing the Ear-Chip spatial response to sound.**

A custom-made platform used to characterize the Ear-Chip response to sounds in different frequencies and different angles. The system custom holder enables to move the speakers both radially around the Ear-Chip and modify the distance from the Chip.

**Figure S4**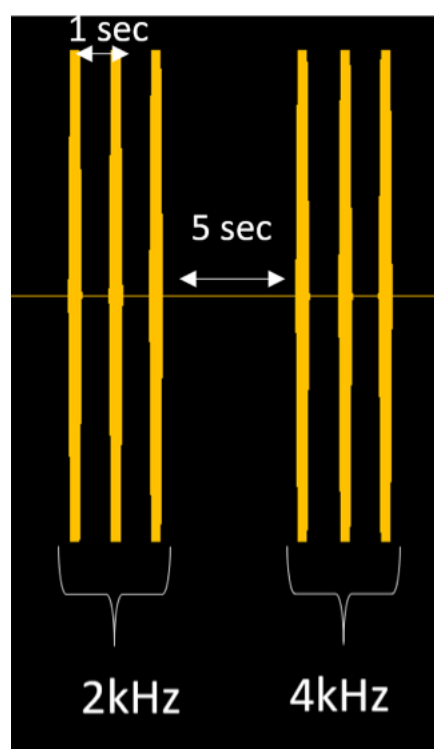**Figure S4: The sound stimulation.**

The stimulation protocol was composed of 60db, three 500ms long sound pulses, spaced by 1000ms of silence. Each group of three pulses was of different frequency (between 0.2 to 15KHz, and separated from the previous group by 5000ms

Figure S5

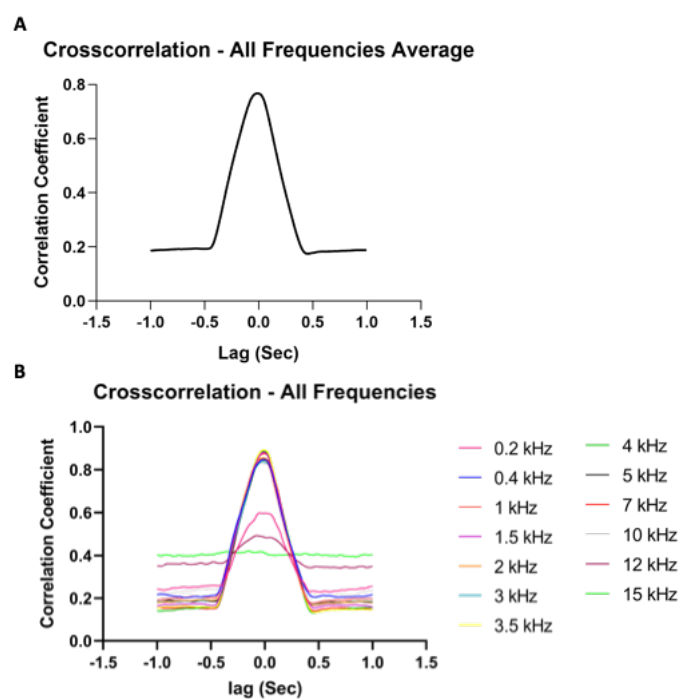

Figure S5: Cross correlation

Cross correlation between the stimulus and the electrophysiological response of the Ear-Chip. **(A)** present the average cross correlation of all the frequencies that were used to stimulate the Ear Chip. **(B)** present an overly of cross correlation for each frequency that was used to stimulate the Ear-Chip.

124 **Figure S6**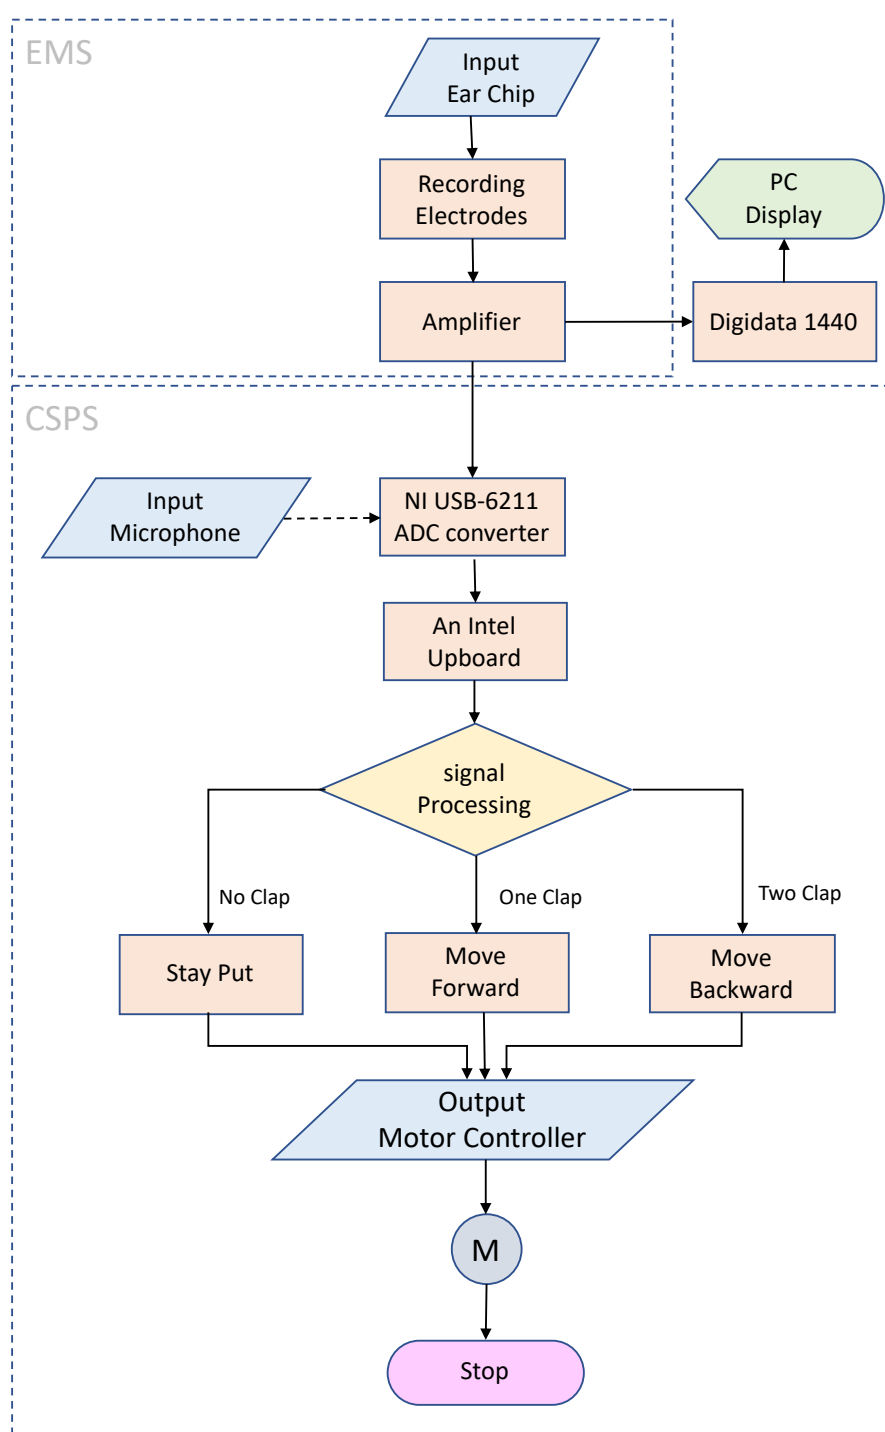

125

126 **Figure S6**

127 Logic diagram of the Ear-Bot.

128

129

130

131

## AC amplifier schematics



151 **SI movies:**

152 **Movie S1: Ear-Chip response to sound.**

153 The locust tympanal organ integrated in the “Ear-Chip” and connected to the recording system. Top  
154 track on the computer screen shows the ear electrical response to a variety of sounds.

155 **Movie S2: Custom platform for assessing the Ear-Chip spatial response to sound.**

156 A custom-made system used to characterize the Ear-Chip response to sounds in different frequencies  
157 and different angles. The system custom holder enables to move the speakers both radially around  
158 the Ear-Chip and modify the distance from the Chip.

159 **Movie S3: Ear-Bot response to sound.**

160 The hybrid bio-robot moves forward as a response to one clap and backward as a response to two  
161 claps. The screen on the right shows the locust hearing organ’s electrophysiological response to the  
162 claps.

163

164

165

166

167

168

169
